# Supplementary material for: Comprehensive analysis of the microbiome in Apis cerana honey highlights honey as a potential source for the isolation of beneficial bacterial strains
Source: PeerJ. 2024 Mar 27;12:e17157. doi: 10.7717/peerj.17157 (PMC10981410; doi:10.7717/peerj.17157)
Supplement: Supplemental Information 2 [file peerj-12-17157-s002.xlsx]

## Sheet: Phylum
Microbiome Taxonomic Profile (MPT) of the honey samples
Taxon name	Taxonomy	Count	Proportion(%)
Firmicutes	Bacteria;Firmicutes	2483	49.9497
Proteobacteria	Bacteria;Proteobacteria	2448	49.2456
Actinobacteria	Bacteria;Actinobacteria	13	0.2615
Acidobacteria	Bacteria;Acidobacteria	8	0.1609
Bacteroidetes	Bacteria;Bacteroidetes	7	0.1408
Planctomycetes	Bacteria;Planctomycetes	4	0.0805
Chloroflexi	Bacteria;Chloroflexi	3	0.0604
Deinococcus-Thermus	Bacteria;Deinococcus-Thermus	2	0.0402
Nitrospirae	Bacteria;Nitrospirae	2	0.0402
Verrucomicrobia	Bacteria;Verrucomicrobia	1	0.0201

## Sheet: Order
honey_composition
Taxon name	Taxonomy	Count	Proportion(%)
Clostridiales	Bacteria;Firmicutes;Clostridia;Clostridiales	2304	47.4562
Orbales	Bacteria;Proteobacteria;Gammaproteobacteria;Orbales	1355	27.9094
Enterobacterales	Bacteria;Proteobacteria;Gammaproteobacteria;Enterobacterales	973	20.0412
Lactobacillales	Bacteria;Firmicutes;Bacilli;Lactobacillales	86	1.7714
Rhizobiales	Bacteria;Proteobacteria;Alphaproteobacteria;Rhizobiales	32	0.6591
Neisseriales	Bacteria;Proteobacteria;Betaproteobacteria;Neisseriales	20	0.4119
Pseudomonadales	Bacteria;Proteobacteria;Gammaproteobacteria;Pseudomonadales	14	0.2884
Corynebacteriales	Bacteria;Actinobacteria;Actinobacteria_c;Corynebacteriales	6	0.1236
Sphingomonadales	Bacteria;Proteobacteria;Alphaproteobacteria;Sphingomonadales	6	0.1236
Rhodospirillales	Bacteria;Proteobacteria;Alphaproteobacteria;Rhodospirillales	5	0.103
Alteromonadales	Bacteria;Proteobacteria;Gammaproteobacteria;Alteromonadales	4	0.0824
Flavobacteriales	Bacteria;Bacteroidetes;Flavobacteria;Flavobacteriales	4	0.0824
Myxococcales	Bacteria;Proteobacteria;Deltaproteobacteria;Myxococcales	4	0.0824
Acidobacteriales	Bacteria;Acidobacteria;Acidobacteriia;Acidobacteriales	3	0.0618
Burkholderiales	Bacteria;Proteobacteria;Betaproteobacteria;Burkholderiales	3	0.0618
Micrococcales	Bacteria;Actinobacteria;Actinobacteria_c;Micrococcales	3	0.0618
Planctomycetales	Bacteria;Planctomycetes;Planctomycetia;Planctomycetales	3	0.0618
Vicinamibacter_o	Bacteria;Acidobacteria;Vicinamibacter_c;Vicinamibacter_o	3	0.0618
Bacteroidales	Bacteria;Bacteroidetes;Bacteroidia;Bacteroidales	2	0.0412
Caulobacterales	Bacteria;Proteobacteria;Alphaproteobacteria;Caulobacterales	2	0.0412
Cellvibrionales	Bacteria;Proteobacteria;Gammaproteobacteria;Cellvibrionales	2	0.0412
Rhodocyclales	Bacteria;Proteobacteria;Betaproteobacteria;Rhodocyclales	2	0.0412
Thermales	Bacteria;Deinococcus-Thermus;Deinococci;Thermales	2	0.0412
Thermoleophilales	Bacteria;Actinobacteria;Thermoleophilia;Thermoleophilales	2	0.0412
Acidimicrobiales	Bacteria;Actinobacteria;Acidimicrobiia;Acidimicrobiales	1	0.0206
Blastocatellales	Bacteria;Acidobacteria;Blastocatellia;Blastocatellales	1	0.0206
Caldilineales	Bacteria;Chloroflexi;Caldilineae;Caldilineales	1	0.0206
Cytophagales	Bacteria;Bacteroidetes;Cytophagia;Cytophagales	1	0.0206
Micromonosporales	Bacteria;Actinobacteria;Actinobacteria_c;Micromonosporales	1	0.0206
Nitrospirales	Bacteria;Nitrospirae;Nitrospira_c;Nitrospirales	1	0.0206
Phycisphaerales	Bacteria;Planctomycetes;Phycisphaerae;Phycisphaerales	1	0.0206
Xanthomonadales	Bacteria;Proteobacteria;Gammaproteobacteria;Xanthomonadales	1	0.0206
HM748667_o	Bacteria;Chloroflexi;HM748667_c;HM748667_o	1	0.0206
PAC000121_o	Bacteria;Acidobacteria;Solibacteres;PAC000121_o	1	0.0206
PAC000395_o	Bacteria;Chloroflexi;Anaerolineae;PAC000395_o	1	0.0206
PAC001922_o	Bacteria;Proteobacteria;Deltaproteobacteria;PAC001922_o	1	0.0206
PAC001956_o	Bacteria;Nitrospirae;Nitrospira_c;PAC001956_o	1	0.0206
Pedosphaera_o	Bacteria;Verrucomicrobia;Verrucomicrobiae;Pedosphaera_o	1	0.0206
Steroidobacter_o	Bacteria;Proteobacteria;Gammaproteobacteria;Steroidobacter_o	1	0.0206

## Sheet: Family
honey_composition
Taxon name	Taxonomy	Count	Proportion(%)
Lachnospiraceae	Bacteria;Firmicutes;Clostridia;Clostridiales;Lachnospiraceae	2299	47.3532
Orbaceae	Bacteria;Proteobacteria;Gammaproteobacteria;Orbales;Orbaceae	1355	27.9094
Enterobacteriaceae	Bacteria;Proteobacteria;Gammaproteobacteria;Enterobacterales;Enterobacteriaceae	956	19.691
Lactobacillaceae	Bacteria;Firmicutes;Bacilli;Lactobacillales;Lactobacillaceae	80	1.6478
Methylobacteriaceae	Bacteria;Proteobacteria;Alphaproteobacteria;Rhizobiales;Methylobacteriaceae	20	0.4119
Neisseriaceae	Bacteria;Proteobacteria;Betaproteobacteria;Neisseriales;Neisseriaceae	20	0.4119
Erwiniaceae	Bacteria;Proteobacteria;Gammaproteobacteria;Enterobacterales;Erwiniaceae	13	0.2678
Pseudomonadaceae	Bacteria;Proteobacteria;Gammaproteobacteria;Pseudomonadales;Pseudomonadaceae	8	0.1648
Moraxellaceae	Bacteria;Proteobacteria;Gammaproteobacteria;Pseudomonadales;Moraxellaceae	6	0.1236
Sphingomonadaceae	Bacteria;Proteobacteria;Alphaproteobacteria;Sphingomonadales;Sphingomonadaceae	6	0.1236
Acetobacteraceae	Bacteria;Proteobacteria;Alphaproteobacteria;Rhodospirillales;Acetobacteraceae	5	0.103
Leuconostocaceae	Bacteria;Firmicutes;Bacilli;Lactobacillales;Leuconostocaceae	5	0.103
Bradyrhizobiaceae	Bacteria;Proteobacteria;Alphaproteobacteria;Rhizobiales;Bradyrhizobiaceae	4	0.0824
Flavobacteriaceae	Bacteria;Bacteroidetes;Flavobacteria;Flavobacteriales;Flavobacteriaceae	4	0.0824
Mycobacteriaceae	Bacteria;Actinobacteria;Actinobacteria_c;Corynebacteriales;Mycobacteriaceae	4	0.0824
Alishewanella_f	Bacteria;Proteobacteria;Gammaproteobacteria;Alteromonadales;Alishewanella_f	4	0.0824
Acidobacteriaceae	Bacteria;Acidobacteria;Acidobacteriia;Acidobacteriales;Acidobacteriaceae	3	0.0618
Haliangiaceae	Bacteria;Proteobacteria;Deltaproteobacteria;Myxococcales;Haliangiaceae	3	0.0618
Caulobacteraceae	Bacteria;Proteobacteria;Alphaproteobacteria;Caulobacterales;Caulobacteraceae	2	0.0412
Cellulomonadaceae	Bacteria;Actinobacteria;Actinobacteria_c;Micrococcales;Cellulomonadaceae	2	0.0412
Cellvibrionaceae	Bacteria;Proteobacteria;Gammaproteobacteria;Cellvibrionales;Cellvibrionaceae	2	0.0412
Comamonadaceae	Bacteria;Proteobacteria;Betaproteobacteria;Burkholderiales;Comamonadaceae	2	0.0412
Corynebacteriaceae	Bacteria;Actinobacteria;Actinobacteria_c;Corynebacteriales;Corynebacteriaceae	2	0.0412
Morganellaceae	Bacteria;Proteobacteria;Gammaproteobacteria;Enterobacterales;Morganellaceae	2	0.0412
Planctomycetaceae	Bacteria;Planctomycetes;Planctomycetia;Planctomycetales;Planctomycetaceae	2	0.0412
Thermaceae	Bacteria;Deinococcus-Thermus;Deinococci;Thermales;Thermaceae	2	0.0412
Thermoleophilaceae	Bacteria;Actinobacteria;Thermoleophilia;Thermoleophilales;Thermoleophilaceae	2	0.0412
Labrys_f	Bacteria;Proteobacteria;Alphaproteobacteria;Rhizobiales;Labrys_f	2	0.0412
Natronincola_f	Bacteria;Firmicutes;Clostridia;Clostridiales;Natronincola_f	2	0.0412
Vicinamibacter_f	Bacteria;Acidobacteria;Vicinamibacter_c;Vicinamibacter_o;Vicinamibacter_f	2	0.0412
Enterobacterales_uc	Bacteria;Proteobacteria;Gammaproteobacteria;Enterobacterales;Enterobacterales_uc	2	0.0412
Acidimicrobiaceae	Bacteria;Actinobacteria;Acidimicrobiia;Acidimicrobiales;Acidimicrobiaceae	1	0.0206
Alcaligenaceae	Bacteria;Proteobacteria;Betaproteobacteria;Burkholderiales;Alcaligenaceae	1	0.0206
Bacteroidaceae	Bacteria;Bacteroidetes;Bacteroidia;Bacteroidales;Bacteroidaceae	1	0.0206
Beijerinckiaceae	Bacteria;Proteobacteria;Alphaproteobacteria;Rhizobiales;Beijerinckiaceae	1	0.0206
Brucellaceae	Bacteria;Proteobacteria;Alphaproteobacteria;Rhizobiales;Brucellaceae	1	0.0206
Caldilineaceae	Bacteria;Chloroflexi;Caldilineae;Caldilineales;Caldilineaceae	1	0.0206
Clostridiaceae	Bacteria;Firmicutes;Clostridia;Clostridiales;Clostridiaceae	1	0.0206
Cytophagaceae	Bacteria;Bacteroidetes;Cytophagia;Cytophagales;Cytophagaceae	1	0.0206
Gemmataceae	Bacteria;Planctomycetes;Planctomycetia;Planctomycetales;Gemmataceae	1	0.0206
Hyphomicrobiaceae	Bacteria;Proteobacteria;Alphaproteobacteria;Rhizobiales;Hyphomicrobiaceae	1	0.0206
Micrococcaceae	Bacteria;Actinobacteria;Actinobacteria_c;Micrococcales;Micrococcaceae	1	0.0206
Micromonosporaceae	Bacteria;Actinobacteria;Actinobacteria_c;Micromonosporales;Micromonosporaceae	1	0.0206
Muribaculaceae	Bacteria;Bacteroidetes;Bacteroidia;Bacteroidales;Muribaculaceae	1	0.0206
Nitrospiraceae	Bacteria;Nitrospirae;Nitrospira_c;Nitrospirales;Nitrospiraceae	1	0.0206
Peptostreptococcaceae	Bacteria;Firmicutes;Clostridia;Clostridiales;Peptostreptococcaceae	1	0.0206
Pyrinomonadaceae	Bacteria;Acidobacteria;Blastocatellia;Blastocatellales;Pyrinomonadaceae	1	0.0206
Rhizobiaceae	Bacteria;Proteobacteria;Alphaproteobacteria;Rhizobiales;Rhizobiaceae	1	0.0206
Rhodocyclaceae	Bacteria;Proteobacteria;Betaproteobacteria;Rhodocyclales;Rhodocyclaceae	1	0.0206
Streptococcaceae	Bacteria;Firmicutes;Bacilli;Lactobacillales;Streptococcaceae	1	0.0206
Tepidisphaeraceae	Bacteria;Planctomycetes;Phycisphaerae;Phycisphaerales;Tepidisphaeraceae	1	0.0206
Xanthomonadaceae	Bacteria;Proteobacteria;Gammaproteobacteria;Xanthomonadales;Xanthomonadaceae	1	0.0206
Zoogloeaceae	Bacteria;Proteobacteria;Betaproteobacteria;Rhodocyclales;Zoogloeaceae	1	0.0206
Devosia_f	Bacteria;Proteobacteria;Alphaproteobacteria;Rhizobiales;Devosia_f	1	0.0206
EU491430_f	Bacteria;Proteobacteria;Deltaproteobacteria;PAC001922_o;EU491430_f	1	0.0206
HM748667_f	Bacteria;Chloroflexi;HM748667_c;HM748667_o;HM748667_f	1	0.0206
PAC000121_f	Bacteria;Acidobacteria;Solibacteres;PAC000121_o;PAC000121_f	1	0.0206
PAC000395_f	Bacteria;Chloroflexi;Anaerolineae;PAC000395_o;PAC000395_f	1	0.0206
PAC000695_f	Bacteria;Proteobacteria;Deltaproteobacteria;Myxococcales;PAC000695_f	1	0.0206
PAC001956_f	Bacteria;Nitrospirae;Nitrospira_c;PAC001956_o;PAC001956_f	1	0.0206
PAC002281_f	Bacteria;Acidobacteria;Vicinamibacter_c;Vicinamibacter_o;PAC002281_f	1	0.0206
Pedosphaera_f	Bacteria;Verrucomicrobia;Verrucomicrobiae;Pedosphaera_o;Pedosphaera_f	1	0.0206
Pleomorphomonas_f	Bacteria;Proteobacteria;Alphaproteobacteria;Rhizobiales;Pleomorphomonas_f	1	0.0206
Steroidobacter_f	Bacteria;Proteobacteria;Gammaproteobacteria;Steroidobacter_o;Steroidobacter_f	1	0.0206
Clostridiales_uc	Bacteria;Firmicutes;Clostridia;Clostridiales;Clostridiales_uc	1	0.0206

## Sheet: Genus
honey_composition
Taxon name	Taxonomy	Count	Proportion(%)
Lachnospiraceae_uc	Bacteria;Firmicutes;Clostridia;Clostridiales;Lachnospiraceae;Lachnospiraceae_uc	2299	47.3532
Gilliamella	Bacteria;Proteobacteria;Gammaproteobacteria;Orbales;Orbaceae;Gilliamella	1307	26.9207
Enterobacter	Bacteria;Proteobacteria;Gammaproteobacteria;Enterobacterales;Enterobacteriaceae;Enterobacter	505	10.4016
Enterobacteriaceae_g	Bacteria;Proteobacteria;Gammaproteobacteria;Enterobacterales;Enterobacteriaceae;Enterobacteriaceae_g	287	5.9114
Lactobacillus	Bacteria;Firmicutes;Bacilli;Lactobacillales;Lactobacillaceae;Lactobacillus	80	1.6478
Enterobacteriaceae_uc	Bacteria;Proteobacteria;Gammaproteobacteria;Enterobacterales;Enterobacteriaceae;Enterobacteriaceae_uc	80	1.6478
Klebsiella	Bacteria;Proteobacteria;Gammaproteobacteria;Enterobacterales;Enterobacteriaceae;Klebsiella	58	1.1946
Frischella	Bacteria;Proteobacteria;Gammaproteobacteria;Orbales;Orbaceae;Frischella	44	0.9063
Methylobacterium	Bacteria;Proteobacteria;Alphaproteobacteria;Rhizobiales;Methylobacteriaceae;Methylobacterium	20	0.4119
Snodgrassella	Bacteria;Proteobacteria;Betaproteobacteria;Neisseriales;Neisseriaceae;Snodgrassella	20	0.4119
Kosakonia	Bacteria;Proteobacteria;Gammaproteobacteria;Enterobacterales;Enterobacteriaceae;Kosakonia	17	0.3502
Pantoea	Bacteria;Proteobacteria;Gammaproteobacteria;Enterobacterales;Erwiniaceae;Pantoea	12	0.2472
Pseudomonas	Bacteria;Proteobacteria;Gammaproteobacteria;Pseudomonadales;Pseudomonadaceae;Pseudomonas	8	0.1648
Bombella	Bacteria;Proteobacteria;Alphaproteobacteria;Rhodospirillales;Acetobacteraceae;Bombella	5	0.103
Citrobacter	Bacteria;Proteobacteria;Gammaproteobacteria;Enterobacterales;Enterobacteriaceae;Citrobacter	4	0.0824
Fructobacillus	Bacteria;Firmicutes;Bacilli;Lactobacillales;Leuconostocaceae;Fructobacillus	4	0.0824
Mycobacterium	Bacteria;Actinobacteria;Actinobacteria_c;Corynebacteriales;Mycobacteriaceae;Mycobacterium	4	0.0824
Rheinheimera	Bacteria;Proteobacteria;Gammaproteobacteria;Alteromonadales;Alishewanella_f;Rheinheimera	4	0.0824
Acinetobacter	Bacteria;Proteobacteria;Gammaproteobacteria;Pseudomonadales;Moraxellaceae;Acinetobacter	3	0.0618
Bradyrhizobium	Bacteria;Proteobacteria;Alphaproteobacteria;Rhizobiales;Bradyrhizobiaceae;Bradyrhizobium	3	0.0618
Enhydrobacter	Bacteria;Proteobacteria;Gammaproteobacteria;Pseudomonadales;Moraxellaceae;Enhydrobacter	3	0.0618
Flavobacterium	Bacteria;Bacteroidetes;Flavobacteria;Flavobacteriales;Flavobacteriaceae;Flavobacterium	3	0.0618
Novosphingobium	Bacteria;Proteobacteria;Alphaproteobacteria;Sphingomonadales;Sphingomonadaceae;Novosphingobium	3	0.0618
Sphingomonas	Bacteria;Proteobacteria;Alphaproteobacteria;Sphingomonadales;Sphingomonadaceae;Sphingomonas	3	0.0618
PAC000245_g	Bacteria;Proteobacteria;Deltaproteobacteria;Myxococcales;Haliangiaceae;PAC000245_g	3	0.0618
Orbaceae_uc	Bacteria;Proteobacteria;Gammaproteobacteria;Orbales;Orbaceae;Orbaceae_uc	3	0.0618
Enterobacterales_uc	Bacteria;Proteobacteria;Gammaproteobacteria;Enterobacterales;Enterobacterales_uc	2	0.0412
Anoxynatronum	Bacteria;Firmicutes;Clostridia;Clostridiales;Natronincola_f;Anoxynatronum	2	0.0412
Cellulomonas	Bacteria;Actinobacteria;Actinobacteria_c;Micrococcales;Cellulomonadaceae;Cellulomonas	2	0.0412
Cellvibrio	Bacteria;Proteobacteria;Gammaproteobacteria;Cellvibrionales;Cellvibrionaceae;Cellvibrio	2	0.0412
Corynebacterium	Bacteria;Actinobacteria;Actinobacteria_c;Corynebacteriales;Corynebacteriaceae;Corynebacterium	2	0.0412
Labrys	Bacteria;Proteobacteria;Alphaproteobacteria;Rhizobiales;Labrys_f;Labrys	2	0.0412
Morganella	Bacteria;Proteobacteria;Gammaproteobacteria;Enterobacterales;Morganellaceae;Morganella	2	0.0412
Thermus	Bacteria;Deinococcus-Thermus;Deinococci;Thermales;Thermaceae;Thermus	2	0.0412
EU881226_g	Bacteria;Planctomycetes;Planctomycetia;Planctomycetales;Planctomycetaceae;EU881226_g	2	0.0412
EU881329_g	Bacteria;Proteobacteria;Alphaproteobacteria;Caulobacterales;Caulobacteraceae;EU881329_g	2	0.0412
PAC000142_g	Bacteria;Actinobacteria;Thermoleophilia;Thermoleophilales;Thermoleophilaceae;PAC000142_g	2	0.0412
Clostridiales_uc	Bacteria;Firmicutes;Clostridia;Clostridiales;Clostridiales_uc	1	0.0206
Achromobacter	Bacteria;Proteobacteria;Betaproteobacteria;Burkholderiales;Alcaligenaceae;Achromobacter	1	0.0206
Acidibacter	Bacteria;Proteobacteria;Gammaproteobacteria;Steroidobacter_o;Steroidobacter_f;Acidibacter	1	0.0206
Acidicapsa	Bacteria;Acidobacteria;Acidobacteriia;Acidobacteriales;Acidobacteriaceae;Acidicapsa	1	0.0206
Azospira	Bacteria;Proteobacteria;Betaproteobacteria;Rhodocyclales;Rhodocyclaceae;Azospira	1	0.0206
Bacteroides	Bacteria;Bacteroidetes;Bacteroidia;Bacteroidales;Bacteroidaceae;Bacteroides	1	0.0206
Chryseobacterium	Bacteria;Bacteroidetes;Flavobacteria;Flavobacteriales;Flavobacteriaceae;Chryseobacterium	1	0.0206
Clostridium	Bacteria;Firmicutes;Clostridia;Clostridiales;Clostridiaceae;Clostridium	1	0.0206
Comamonas	Bacteria;Proteobacteria;Betaproteobacteria;Burkholderiales;Comamonadaceae;Comamonas	1	0.0206
Couchioplanes	Bacteria;Actinobacteria;Actinobacteria_c;Micromonosporales;Micromonosporaceae;Couchioplanes	1	0.0206
Cronobacter	Bacteria;Proteobacteria;Gammaproteobacteria;Enterobacterales;Enterobacteriaceae;Cronobacter	1	0.0206
Devosia	Bacteria;Proteobacteria;Alphaproteobacteria;Rhizobiales;Devosia_f;Devosia	1	0.0206
Dyadobacter	Bacteria;Bacteroidetes;Cytophagia;Cytophagales;Cytophagaceae;Dyadobacter	1	0.0206
Erwinia	Bacteria;Proteobacteria;Gammaproteobacteria;Enterobacterales;Erwiniaceae;Erwinia	1	0.0206
Escherichia	Bacteria;Proteobacteria;Gammaproteobacteria;Enterobacterales;Enterobacteriaceae;Escherichia	1	0.0206
Hyphomicrobium	Bacteria;Proteobacteria;Alphaproteobacteria;Rhizobiales;Hyphomicrobiaceae;Hyphomicrobium	1	0.0206
Limisphaera	Bacteria;Verrucomicrobia;Verrucomicrobiae;Pedosphaera_o;Pedosphaera_f;Limisphaera	1	0.0206
Nitrospira	Bacteria;Nitrospirae;Nitrospira_c;Nitrospirales;Nitrospiraceae;Nitrospira	1	0.0206
Ochrobactrum	Bacteria;Proteobacteria;Alphaproteobacteria;Rhizobiales;Brucellaceae;Ochrobactrum	1	0.0206
Pleomorphomonas	Bacteria;Proteobacteria;Alphaproteobacteria;Rhizobiales;Pleomorphomonas_f;Pleomorphomonas	1	0.0206
Pseudolabrys	Bacteria;Proteobacteria;Alphaproteobacteria;Rhizobiales;Bradyrhizobiaceae;Pseudolabrys	1	0.0206
Raoultella	Bacteria;Proteobacteria;Gammaproteobacteria;Enterobacterales;Enterobacteriaceae;Raoultella	1	0.0206
Rhizobacter	Bacteria;Proteobacteria;Betaproteobacteria;Burkholderiales;Comamonadaceae;Rhizobacter	1	0.0206
Rhizobium	Bacteria;Proteobacteria;Alphaproteobacteria;Rhizobiales;Rhizobiaceae;Rhizobium	1	0.0206
Romboutsia	Bacteria;Firmicutes;Clostridia;Clostridiales;Peptostreptococcaceae;Romboutsia	1	0.0206
Rothia	Bacteria;Actinobacteria;Actinobacteria_c;Micrococcales;Micrococcaceae;Rothia	1	0.0206
Salmonella	Bacteria;Proteobacteria;Gammaproteobacteria;Enterobacterales;Enterobacteriaceae;Salmonella	1	0.0206
Schmidhempelia	Bacteria;Proteobacteria;Gammaproteobacteria;Orbales;Orbaceae;Schmidhempelia	1	0.0206
Stenotrophomonas	Bacteria;Proteobacteria;Gammaproteobacteria;Xanthomonadales;Xanthomonadaceae;Stenotrophomonas	1	0.0206
Streptococcus	Bacteria;Firmicutes;Bacilli;Lactobacillales;Streptococcaceae;Streptococcus	1	0.0206
Tepidisphaera	Bacteria;Planctomycetes;Phycisphaerae;Phycisphaerales;Tepidisphaeraceae;Tepidisphaera	1	0.0206
Trabulsiella	Bacteria;Proteobacteria;Gammaproteobacteria;Enterobacterales;Enterobacteriaceae;Trabulsiella	1	0.0206
Weissella	Bacteria;Firmicutes;Bacilli;Lactobacillales;Leuconostocaceae;Weissella	1	0.0206
Zoogloea	Bacteria;Proteobacteria;Betaproteobacteria;Rhodocyclales;Zoogloeaceae;Zoogloea	1	0.0206
AB364755_g	Bacteria;Acidobacteria;Acidobacteriia;Acidobacteriales;Acidobacteriaceae;AB364755_g	1	0.0206
AF234716_g	Bacteria;Chloroflexi;Anaerolineae;PAC000395_o;PAC000395_f;AF234716_g	1	0.0206
AY281358_g	Bacteria;Acidobacteria;Blastocatellia;Blastocatellales;Pyrinomonadaceae;AY281358_g	1	0.0206
EU289441_g	Bacteria;Proteobacteria;Alphaproteobacteria;Rhizobiales;Beijerinckiaceae;EU289441_g	1	0.0206
GQ263104_g	Bacteria;Chloroflexi;Caldilineae;Caldilineales;Caldilineaceae;GQ263104_g	1	0.0206
HM123997_g	Bacteria;Bacteroidetes;Bacteroidia;Bacteroidales;Muribaculaceae;HM123997_g	1	0.0206
HM748667_g	Bacteria;Chloroflexi;HM748667_c;HM748667_o;HM748667_f;HM748667_g	1	0.0206
HM748739_g	Bacteria;Acidobacteria;Acidobacteriia;Acidobacteriales;Acidobacteriaceae;HM748739_g	1	0.0206
JF718671_g	Bacteria;Proteobacteria;Deltaproteobacteria;PAC001922_o;EU491430_f;JF718671_g	1	0.0206
PAC000046_g	Bacteria;Acidobacteria;Solibacteres;PAC000121_o;PAC000121_f;PAC000046_g	1	0.0206
PAC000068_g	Bacteria;Actinobacteria;Acidimicrobiia;Acidimicrobiales;Acidimicrobiaceae;PAC000068_g	1	0.0206
PAC000151_g	Bacteria;Planctomycetes;Planctomycetia;Planctomycetales;Gemmataceae;PAC000151_g	1	0.0206
PAC000695_g	Bacteria;Proteobacteria;Deltaproteobacteria;Myxococcales;PAC000695_f;PAC000695_g	1	0.0206
PAC001869_g	Bacteria;Acidobacteria;Vicinamibacter_c;Vicinamibacter_o;Vicinamibacter_f;PAC001869_g	1	0.0206
PAC001874_g	Bacteria;Acidobacteria;Vicinamibacter_c;Vicinamibacter_o;Vicinamibacter_f;PAC001874_g	1	0.0206
PAC001956_g	Bacteria;Nitrospirae;Nitrospira_c;PAC001956_o;PAC001956_f;PAC001956_g	1	0.0206
PAC002281_g	Bacteria;Acidobacteria;Vicinamibacter_c;Vicinamibacter_o;PAC002281_f;PAC002281_g	1	0.0206

## Sheet: Species
honey_composition
Taxon name	Taxonomy	Count	Proportion(%)
Lachnospiraceae_uc	Bacteria;Firmicutes;Clostridia;Clostridiales;Lachnospiraceae;Lachnospiraceae_uc	2299	47.3532
Gilliamella apicola group	Bacteria;Proteobacteria;Gammaproteobacteria;Orbales;Orbaceae;Gilliamella;Gilliamella apicola group	679	13.9856
Gilliamella JFON_s	Bacteria;Proteobacteria;Gammaproteobacteria;Orbales;Orbaceae;Gilliamella;JFON_s	374	7.7034
Enterobacter_uc	Bacteria;Proteobacteria;Gammaproteobacteria;Enterobacterales;Enterobacteriaceae;Enterobacter;Enterobacter_uc	374	7.7034
Enterobacteriaceae group	Bacteria;Proteobacteria;Gammaproteobacteria;Enterobacterales;Enterobacteriaceae;Enterobacteriaceae_g;Enterobacteriaceae group	287	5.9114
Gilliamella_uc	Bacteria;Proteobacteria;Gammaproteobacteria;Orbales;Orbaceae;Gilliamella;Gilliamella_uc	253	5.2111
Enterobacteriaceae_uc	Bacteria;Proteobacteria;Gammaproteobacteria;Enterobacterales;Enterobacteriaceae;Enterobacteriaceae_uc	80	1.6478
Lactobacillus kunkeei group	Bacteria;Firmicutes;Bacilli;Lactobacillales;Lactobacillaceae;Lactobacillus;Lactobacillus kunkeei group	71	1.4624
Enterobacter kobei	Bacteria;Proteobacteria;Gammaproteobacteria;Enterobacterales;Enterobacteriaceae;Enterobacter;Enterobacter kobei	66	1.3594
Klebsiella FWNZ_s	Bacteria;Proteobacteria;Gammaproteobacteria;Enterobacterales;Enterobacteriaceae;Klebsiella;FWNZ_s	58	1.1946
Enterobacter cloacae group	Bacteria;Proteobacteria;Gammaproteobacteria;Enterobacterales;Enterobacteriaceae;Enterobacter;Enterobacter cloacae group	53	1.0917
Frischella perrara	Bacteria;Proteobacteria;Gammaproteobacteria;Orbales;Orbaceae;Frischella;Frischella perrara	37	0.7621
Methylobacterium extorquens group	Bacteria;Proteobacteria;Alphaproteobacteria;Rhizobiales;Methylobacteriaceae;Methylobacterium;Methylobacterium extorquens group	20	0.4119
Kosakonia cowanii group	Bacteria;Proteobacteria;Gammaproteobacteria;Enterobacterales;Enterobacteriaceae;Kosakonia;Kosakonia cowanii group	17	0.3502
Snodgrassella_uc	Bacteria;Proteobacteria;Betaproteobacteria;Neisseriales;Neisseriaceae;Snodgrassella;Snodgrassella_uc	16	0.3296
Enterobacter KQ235774_s	Bacteria;Proteobacteria;Gammaproteobacteria;Enterobacterales;Enterobacteriaceae;Enterobacter;KQ235774_s	12	0.2472
Pantoea agglomerans group	Bacteria;Proteobacteria;Gammaproteobacteria;Enterobacterales;Erwiniaceae;Pantoea;Pantoea agglomerans group	10	0.206
Pseudomonas aeruginosa group	Bacteria;Proteobacteria;Gammaproteobacteria;Pseudomonadales;Pseudomonadaceae;Pseudomonas;Pseudomonas aeruginosa group	8	0.1648
Frischella_uc	Bacteria;Proteobacteria;Gammaproteobacteria;Orbales;Orbaceae;Frischella;Frischella_uc	7	0.1442
Bombella intestini group	Bacteria;Proteobacteria;Alphaproteobacteria;Rhodospirillales;Acetobacteraceae;Bombella;Bombella intestini group	5	0.103
Citrobacter koseri	Bacteria;Proteobacteria;Gammaproteobacteria;Enterobacterales;Enterobacteriaceae;Citrobacter;Citrobacter koseri	4	0.0824
Rheinheimera aquatica	Bacteria;Proteobacteria;Gammaproteobacteria;Alteromonadales;Alishewanella_f;Rheinheimera;Rheinheimera aquatica	4	0.0824
Snodgrassella alvi	Bacteria;Proteobacteria;Betaproteobacteria;Neisseriales;Neisseriaceae;Snodgrassella;Snodgrassella alvi	4	0.0824
Orbaceae_uc	Bacteria;Proteobacteria;Gammaproteobacteria;Orbales;Orbaceae;Orbaceae_uc	3	0.0618
Bradyrhizobium japonicum group	Bacteria;Proteobacteria;Alphaproteobacteria;Rhizobiales;Bradyrhizobiaceae;Bradyrhizobium;Bradyrhizobium japonicum group	3	0.0618
Enhydrobacter aerosaccus group	Bacteria;Proteobacteria;Gammaproteobacteria;Pseudomonadales;Moraxellaceae;Enhydrobacter;Enhydrobacter aerosaccus group	3	0.0618
Fructobacillus durionis	Bacteria;Firmicutes;Bacilli;Lactobacillales;Leuconostocaceae;Fructobacillus;Fructobacillus durionis	3	0.0618
Lactobacillus ozensis	Bacteria;Firmicutes;Bacilli;Lactobacillales;Lactobacillaceae;Lactobacillus;Lactobacillus ozensis	3	0.0618
PAC000245_g_uc	Bacteria;Proteobacteria;Deltaproteobacteria;Myxococcales;Haliangiaceae;PAC000245_g;PAC000245_g_uc	3	0.0618
Enterobacterales_uc	Bacteria;Proteobacteria;Gammaproteobacteria;Enterobacterales;Enterobacterales_uc	2	0.0412
Acinetobacter proteolyticus group	Bacteria;Proteobacteria;Gammaproteobacteria;Pseudomonadales;Moraxellaceae;Acinetobacter;Acinetobacter proteolyticus group	2	0.0412
Cellulomonas cellasea group	Bacteria;Actinobacteria;Actinobacteria_c;Micrococcales;Cellulomonadaceae;Cellulomonas;Cellulomonas cellasea group	2	0.0412
Cellvibrio fibrivorans	Bacteria;Proteobacteria;Gammaproteobacteria;Cellvibrionales;Cellvibrionaceae;Cellvibrio;Cellvibrio fibrivorans	2	0.0412
Corynebacterium deserti	Bacteria;Actinobacteria;Actinobacteria_c;Corynebacteriales;Corynebacteriaceae;Corynebacterium;Corynebacterium deserti	2	0.0412
Labrys methylaminiphilus group	Bacteria;Proteobacteria;Alphaproteobacteria;Rhizobiales;Labrys_f;Labrys;Labrys methylaminiphilus group	2	0.0412
Mycobacterium llatzerense	Bacteria;Actinobacteria;Actinobacteria_c;Corynebacteriales;Mycobacteriaceae;Mycobacterium;Mycobacterium llatzerense	2	0.0412
Novosphingobium sediminicola	Bacteria;Proteobacteria;Alphaproteobacteria;Sphingomonadales;Sphingomonadaceae;Novosphingobium;Novosphingobium sediminicola	2	0.0412
Sphingomonas phyllosphaerae group	Bacteria;Proteobacteria;Alphaproteobacteria;Sphingomonadales;Sphingomonadaceae;Sphingomonas;Sphingomonas phyllosphaerae group	2	0.0412
Thermus scotoductus group	Bacteria;Deinococcus-Thermus;Deinococci;Thermales;Thermaceae;Thermus;Thermus scotoductus group	2	0.0412
Morganella AYMP_s	Bacteria;Proteobacteria;Gammaproteobacteria;Enterobacterales;Morganellaceae;Morganella;AYMP_s	2	0.0412
PAC000142_g EU677394_s	Bacteria;Actinobacteria;Thermoleophilia;Thermoleophilales;Thermoleophilaceae;PAC000142_g;EU677394_s	2	0.0412
EU881329_g EU881329_s	Bacteria;Proteobacteria;Alphaproteobacteria;Caulobacterales;Caulobacteraceae;EU881329_g;EU881329_s	2	0.0412
Lactobacillus HM109530_s	Bacteria;Firmicutes;Bacilli;Lactobacillales;Lactobacillaceae;Lactobacillus;HM109530_s	2	0.0412
Anoxynatronum_uc	Bacteria;Firmicutes;Clostridia;Clostridiales;Natronincola_f;Anoxynatronum;Anoxynatronum_uc	2	0.0412
Lactobacillus_uc	Bacteria;Firmicutes;Bacilli;Lactobacillales;Lactobacillaceae;Lactobacillus;Lactobacillus_uc	2	0.0412
EU881226_g_uc	Bacteria;Planctomycetes;Planctomycetia;Planctomycetales;Planctomycetaceae;EU881226_g;EU881226_g_uc	2	0.0412
Clostridiales_uc	Bacteria;Firmicutes;Clostridia;Clostridiales;Clostridiales_uc	1	0.0206
Achromobacter xylosoxidans group	Bacteria;Proteobacteria;Betaproteobacteria;Burkholderiales;Alcaligenaceae;Achromobacter;Achromobacter xylosoxidans group	1	0.0206
Acidicapsa acidisoli	Bacteria;Acidobacteria;Acidobacteriia;Acidobacteriales;Acidobacteriaceae;Acidicapsa;Acidicapsa acidisoli	1	0.0206
Azospira oryzae	Bacteria;Proteobacteria;Betaproteobacteria;Rhodocyclales;Rhodocyclaceae;Azospira;Azospira oryzae	1	0.0206
Bacteroides acidifaciens	Bacteria;Bacteroidetes;Bacteroidia;Bacteroidales;Bacteroidaceae;Bacteroides;Bacteroides acidifaciens	1	0.0206
Chryseobacterium hagamense group	Bacteria;Bacteroidetes;Flavobacteria;Flavobacteriales;Flavobacteriaceae;Chryseobacterium;Chryseobacterium hagamense group	1	0.0206
Clostridium magnum	Bacteria;Firmicutes;Clostridia;Clostridiales;Clostridiaceae;Clostridium;Clostridium magnum	1	0.0206
Comamonas aquatica	Bacteria;Proteobacteria;Betaproteobacteria;Burkholderiales;Comamonadaceae;Comamonas;Comamonas aquatica	1	0.0206
Couchioplanes caeruleus group	Bacteria;Actinobacteria;Actinobacteria_c;Micromonosporales;Micromonosporaceae;Couchioplanes;Couchioplanes caeruleus group	1	0.0206
Cronobacter malonaticus	Bacteria;Proteobacteria;Gammaproteobacteria;Enterobacterales;Enterobacteriaceae;Cronobacter;Cronobacter malonaticus	1	0.0206
Devosia insulae group	Bacteria;Proteobacteria;Alphaproteobacteria;Rhizobiales;Devosia_f;Devosia;Devosia insulae group	1	0.0206
Dyadobacter beijingensis group	Bacteria;Bacteroidetes;Cytophagia;Cytophagales;Cytophagaceae;Dyadobacter;Dyadobacter beijingensis group	1	0.0206
Erwinia aphidicola	Bacteria;Proteobacteria;Gammaproteobacteria;Enterobacterales;Erwiniaceae;Erwinia;Erwinia aphidicola	1	0.0206
Escherichia coli group	Bacteria;Proteobacteria;Gammaproteobacteria;Enterobacterales;Enterobacteriaceae;Escherichia;Escherichia coli group	1	0.0206
Flavobacterium ginsengisoli	Bacteria;Bacteroidetes;Flavobacteria;Flavobacteriales;Flavobacteriaceae;Flavobacterium;Flavobacterium ginsengisoli	1	0.0206
Flavobacterium nitratireducens group	Bacteria;Bacteroidetes;Flavobacteria;Flavobacteriales;Flavobacteriaceae;Flavobacterium;Flavobacterium nitratireducens group	1	0.0206
Flavobacterium tilapiae	Bacteria;Bacteroidetes;Flavobacteria;Flavobacteriales;Flavobacteriaceae;Flavobacterium;Flavobacterium tilapiae	1	0.0206
Fructobacillus ficulneus	Bacteria;Firmicutes;Bacilli;Lactobacillales;Leuconostocaceae;Fructobacillus;Fructobacillus ficulneus	1	0.0206
Gilliamella mensalis group	Bacteria;Proteobacteria;Gammaproteobacteria;Orbales;Orbaceae;Gilliamella;Gilliamella mensalis group	1	0.0206
Lactobacillus kimbladii	Bacteria;Firmicutes;Bacilli;Lactobacillales;Lactobacillaceae;Lactobacillus;Lactobacillus kimbladii	1	0.0206
Lactobacillus murinus group	Bacteria;Firmicutes;Bacilli;Lactobacillales;Lactobacillaceae;Lactobacillus;Lactobacillus murinus group	1	0.0206
Mycobacterium farcinogenes group	Bacteria;Actinobacteria;Actinobacteria_c;Corynebacteriales;Mycobacteriaceae;Mycobacterium;Mycobacterium farcinogenes group	1	0.0206
Mycobacterium tuberculosis group	Bacteria;Actinobacteria;Actinobacteria_c;Corynebacteriales;Mycobacteriaceae;Mycobacterium;Mycobacterium tuberculosis group	1	0.0206
Ochrobactrum pseudogrignonense	Bacteria;Proteobacteria;Alphaproteobacteria;Rhizobiales;Brucellaceae;Ochrobactrum;Ochrobactrum pseudogrignonense	1	0.0206
Pantoea coffeiphila	Bacteria;Proteobacteria;Gammaproteobacteria;Enterobacterales;Erwiniaceae;Pantoea;Pantoea coffeiphila	1	0.0206
Pantoea septica	Bacteria;Proteobacteria;Gammaproteobacteria;Enterobacterales;Erwiniaceae;Pantoea;Pantoea septica	1	0.0206
Pleomorphomonas oryzae group	Bacteria;Proteobacteria;Alphaproteobacteria;Rhizobiales;Pleomorphomonas_f;Pleomorphomonas;Pleomorphomonas oryzae group	1	0.0206
Raoultella planticola group	Bacteria;Proteobacteria;Gammaproteobacteria;Enterobacterales;Enterobacteriaceae;Raoultella;Raoultella planticola group	1	0.0206
Rhizobacter dauci group	Bacteria;Proteobacteria;Betaproteobacteria;Burkholderiales;Comamonadaceae;Rhizobacter;Rhizobacter dauci group	1	0.0206
Rhizobium larrymoorei group	Bacteria;Proteobacteria;Alphaproteobacteria;Rhizobiales;Rhizobiaceae;Rhizobium;Rhizobium larrymoorei group	1	0.0206
Romboutsia timonensis	Bacteria;Firmicutes;Clostridia;Clostridiales;Peptostreptococcaceae;Romboutsia;Romboutsia timonensis	1	0.0206
Rothia mucilaginosa group	Bacteria;Actinobacteria;Actinobacteria_c;Micrococcales;Micrococcaceae;Rothia;Rothia mucilaginosa group	1	0.0206
Salmonella bongori	Bacteria;Proteobacteria;Gammaproteobacteria;Enterobacterales;Enterobacteriaceae;Salmonella;Salmonella bongori	1	0.0206
Schmidhempelia bombi	Bacteria;Proteobacteria;Gammaproteobacteria;Orbales;Orbaceae;Schmidhempelia;Schmidhempelia bombi	1	0.0206
Sphingomonas yunnanensis	Bacteria;Proteobacteria;Alphaproteobacteria;Sphingomonadales;Sphingomonadaceae;Sphingomonas;Sphingomonas yunnanensis	1	0.0206
Stenotrophomonas maltophilia group	Bacteria;Proteobacteria;Gammaproteobacteria;Xanthomonadales;Xanthomonadaceae;Stenotrophomonas;Stenotrophomonas maltophilia group	1	0.0206
Streptococcus gallolyticus group	Bacteria;Firmicutes;Bacilli;Lactobacillales;Streptococcaceae;Streptococcus;Streptococcus gallolyticus group	1	0.0206
Trabulsiella guamensis group	Bacteria;Proteobacteria;Gammaproteobacteria;Enterobacterales;Enterobacteriaceae;Trabulsiella;Trabulsiella guamensis group	1	0.0206
Weissella kandleri group	Bacteria;Firmicutes;Bacilli;Lactobacillales;Leuconostocaceae;Weissella;Weissella kandleri group	1	0.0206
Zoogloea resiniphila	Bacteria;Proteobacteria;Betaproteobacteria;Rhodocyclales;Zoogloeaceae;Zoogloea;Zoogloea resiniphila	1	0.0206
AB364755_g AB364756_s	Bacteria;Acidobacteria;Acidobacteriia;Acidobacteriales;Acidobacteriaceae;AB364755_g;AB364756_s	1	0.0206
Tepidisphaera AB486106_s	Bacteria;Planctomycetes;Phycisphaerae;Phycisphaerales;Tepidisphaeraceae;Tepidisphaera;AB486106_s	1	0.0206
AF234716_g AF234716_s	Bacteria;Chloroflexi;Anaerolineae;PAC000395_o;PAC000395_f;AF234716_g;AF234716_s	1	0.0206
HM748667_g EF018406_s	Bacteria;Chloroflexi;HM748667_c;HM748667_o;HM748667_f;HM748667_g;EF018406_s	1	0.0206
AY281358_g EF516944_s	Bacteria;Acidobacteria;Blastocatellia;Blastocatellales;Pyrinomonadaceae;AY281358_g;EF516944_s	1	0.0206
PAC002281_g EU937897_s	Bacteria;Acidobacteria;Vicinamibacter_c;Vicinamibacter_o;PAC002281_f;PAC002281_g;EU937897_s	1	0.0206
Acinetobacter FJ192503_s	Bacteria;Proteobacteria;Gammaproteobacteria;Pseudomonadales;Moraxellaceae;Acinetobacter;FJ192503_s	1	0.0206
PAC001869_g FJ889212_s	Bacteria;Acidobacteria;Vicinamibacter_c;Vicinamibacter_o;Vicinamibacter_f;PAC001869_g;FJ889212_s	1	0.0206
Hyphomicrobium FPEJ_s group	Bacteria;Proteobacteria;Alphaproteobacteria;Rhizobiales;Hyphomicrobiaceae;Hyphomicrobium;FPEJ_s group	1	0.0206
PAC000151_g GQ402825_s	Bacteria;Planctomycetes;Planctomycetia;Planctomycetales;Gemmataceae;PAC000151_g;GQ402825_s	1	0.0206
PAC001874_g HM062253_s	Bacteria;Acidobacteria;Vicinamibacter_c;Vicinamibacter_o;Vicinamibacter_f;PAC001874_g;HM062253_s	1	0.0206
HM123997_g HM123997_s	Bacteria;Bacteroidetes;Bacteroidia;Bacteroidales;Muribaculaceae;HM123997_g;HM123997_s	1	0.0206
PAC000695_g HQ232442_s	Bacteria;Proteobacteria;Deltaproteobacteria;Myxococcales;PAC000695_f;PAC000695_g;HQ232442_s	1	0.0206
EU289441_g JF069889_s	Bacteria;Proteobacteria;Alphaproteobacteria;Rhizobiales;Beijerinckiaceae;EU289441_g;JF069889_s	1	0.0206
JF718671_g JN038700_s	Bacteria;Proteobacteria;Deltaproteobacteria;PAC001922_o;EU491430_f;JF718671_g;JN038700_s	1	0.0206
Limisphaera JN820195_s	Bacteria;Verrucomicrobia;Verrucomicrobiae;Pedosphaera_o;Pedosphaera_f;Limisphaera;JN820195_s	1	0.0206
PAC000068_g PAC000338_s	Bacteria;Actinobacteria;Acidimicrobiia;Acidimicrobiales;Acidimicrobiaceae;PAC000068_g;PAC000338_s	1	0.0206
HM748739_g PAC001826_s group	Bacteria;Acidobacteria;Acidobacteriia;Acidobacteriales;Acidobacteriaceae;HM748739_g;PAC001826_s group	1	0.0206
Nitrospira PAC001891_s	Bacteria;Nitrospirae;Nitrospira_c;Nitrospirales;Nitrospiraceae;Nitrospira;PAC001891_s	1	0.0206
Pseudolabrys PAC002566_s	Bacteria;Proteobacteria;Alphaproteobacteria;Rhizobiales;Bradyrhizobiaceae;Pseudolabrys;PAC002566_s	1	0.0206
Acidibacter PAC002618_s	Bacteria;Proteobacteria;Gammaproteobacteria;Steroidobacter_o;Steroidobacter_f;Acidibacter;PAC002618_s	1	0.0206
Novosphingobium_uc	Bacteria;Proteobacteria;Alphaproteobacteria;Sphingomonadales;Sphingomonadaceae;Novosphingobium;Novosphingobium_uc	1	0.0206
GQ263104_g_uc	Bacteria;Chloroflexi;Caldilineae;Caldilineales;Caldilineaceae;GQ263104_g;GQ263104_g_uc	1	0.0206
PAC000046_g_uc	Bacteria;Acidobacteria;Solibacteres;PAC000121_o;PAC000121_f;PAC000046_g;PAC000046_g_uc	1	0.0206
PAC001956_g_uc	Bacteria;Nitrospirae;Nitrospira_c;PAC001956_o;PAC001956_f;PAC001956_g;PAC001956_g_uc	1	0.0206
